# Supplementary material for: Population effect of 10-valent pneumococcal conjugate vaccine on nasopharyngeal carriage of Streptococcus pneumoniae and non-typeable Haemophilus influenzae in Kilifi, Kenya: findings from cross-sectional carriage studies
Source: PubMed Central journal article supplement (PMC5628631; doi:10.1016/s2214-109x(14)70224-4), 2014-07
Supplement: mmc1.pdf [file mmc1.pdf]

## Supplementary appendix

This appendix formed part of the original submission and has been peer reviewed. We post it as supplied by the authors.

Supplement to: Hammitt LL, Akech DO, Morpeth SC, et al. Population effect of 10-valent pneumococcal conjugate vaccine on nasopharyngeal carriage of *Streptococcus pneumoniae* and non-typeable *Haemophilus influenzae* in Kilifi, Kenya: findings from cross-sectional carriage studies. *Lancet Glob Health* 2014; published online May 28. [http://dx.doi.org/10.1016/S2214-109X\(14\)70224-4](http://dx.doi.org/10.1016/S2214-109X(14)70224-4).

**eTable 1. Carriage prevalence and odds ratio for nasopharyngeal carriage of *S. pneumoniae*, non-typeable *H. influenzae* and *S. aureus* in participants aged <5 years and ≥5 years, Kilifi, Kenya, 2009 – 2012**

|                                       | Carriage Prevalence<br>Baseline period* |    | Carriage Prevalence<br>Vaccine Period† |    | Crude Odds Ratio (OR) |            | Age-standardized Adjusted<br>Odds Ratio (aOR)‡ |            |
|---------------------------------------|-----------------------------------------|----|----------------------------------------|----|-----------------------|------------|------------------------------------------------|------------|
|                                       | n                                       | %  | n                                      | %  | OR                    | 95% CIs    | aOR                                            | 95% CIs    |
| <i>Vaccine-type S. pneumoniae</i>     |                                         |    |                                        |    |                       |            |                                                |            |
| <5 years                              | 104                                     | 34 | 41                                     | 13 | 0.29                  | 0.20, 0.44 | 0.26                                           | 0.17, 0.41 |
| ≥5 years                              | 59                                      | 8  | 25                                     | 4  | 0.41                  | 0.25, 0.66 | 0.32§                                          | 0.17, 0.60 |
| <i>Non vaccine-type S. pneumoniae</i> |                                         |    |                                        |    |                       |            |                                                |            |
| <5 years                              | 125                                     | 41 | 179                                    | 57 | 1.93                  | 1.40, 2.65 | 1.82                                           | 1.27, 2.60 |
| ≥5 years                              | 167                                     | 24 | 186                                    | 27 | 1.18                  | 0.92, 1.50 | 1.17                                           | 0.87, 1.57 |
| <i>All S. pneumoniae</i>              |                                         |    |                                        |    |                       |            |                                                |            |
| <5 years                              | 229                                     | 74 | 213                                    | 68 | 0.72                  | 0.51, 1.02 | 0.59                                           | 0.40, 0.88 |
| ≥5 years                              | 226                                     | 32 | 204                                    | 29 | 0.88                  | 0.70, 1.11 | 0.77                                           | 0.58, 1.02 |
| <i>Non-typeable H. influenzae</i>     |                                         |    |                                        |    |                       |            |                                                |            |
| <5 years                              | 167                                     | 54 | 126                                    | 40 | 0.56                  | 0.41, 0.77 | 0.40                                           | 0.27, 0.58 |
| ≥5 years                              | 168                                     | 24 | 127                                    | 18 | 0.71                  | 0.55, 0.93 | 0.62                                           | 0.45, 0.85 |
| <i>S. aureus</i>                      |                                         |    |                                        |    |                       |            |                                                |            |
| <5 years                              | 19                                      | 6  | 20                                     | 6  | 1.03                  | 0.54, 1.95 | 1.01                                           | 0.50, 2.07 |
| ≥5 years                              | 56                                      | 8  | 48                                     | 7  | 0.86                  | 0.58, 1.28 | 0.89                                           | 0.57, 1.39 |

The model assumes stationarity and that duration of carriage is unchanged by vaccination.<sup>25</sup>

CI = Confidence Interval

\*The total sample in 2009-10 was 308 and 709 in <5 and ≥5 year olds, respectively.

†The total sample in 2011-12 was 315 and 699 in <5 and ≥5 year olds, respectively.

‡Adjusted for month of swab collection, number of people sharing a bed and antibiotic use in the 14 days preceding swab collection.

§The frequency of vaccine-type pneumococci among participants aged 20-39 in the vaccine period was zero; this stratum was combined with the group aged 40-49 years for the age-standardized analysis.
